# Supplementary material
Source: PubMed Central journal article supplement (PMC6459994)
Supplement: PRO-28-941-s001.pdf [file PRO-28-941-s001.pdf]

**Supplementary Material for:**

**Protecting activity of desiccated enzymes**

Samantha Piszkiwicz<sup>1</sup>, Kathryn H. Gunn<sup>2</sup>, Owen Warmuth<sup>1</sup>, Ashlee Propst<sup>1</sup>,  
Aakash Mehta<sup>1</sup>, Kenny H. Nguyen<sup>1</sup>, Elizabeth Kuhlman<sup>2</sup>, Alex J. Guseman<sup>1</sup>,  
Samantha S. Stadmiller<sup>1</sup>, Thomas C. Boothby<sup>1</sup>, Saskia B. Neher<sup>2</sup>, and Gary J.  
Pielak<sup>1,2,3,4 \*</sup>

<sup>1</sup>Department of Chemistry

<sup>2</sup>Department of Biochemistry and Biophysics

<sup>3</sup>Lineberger Comprehensive Cancer Center

<sup>4</sup>Integrative Program for Biological and Genome Sciences University of North  
Carolina, Chapel Hill, NC, USA 27599

\*To whom correspondence should be addressed. Tel: 919 962 4495 E-mail:  
gary\_pielak@unc.edu.

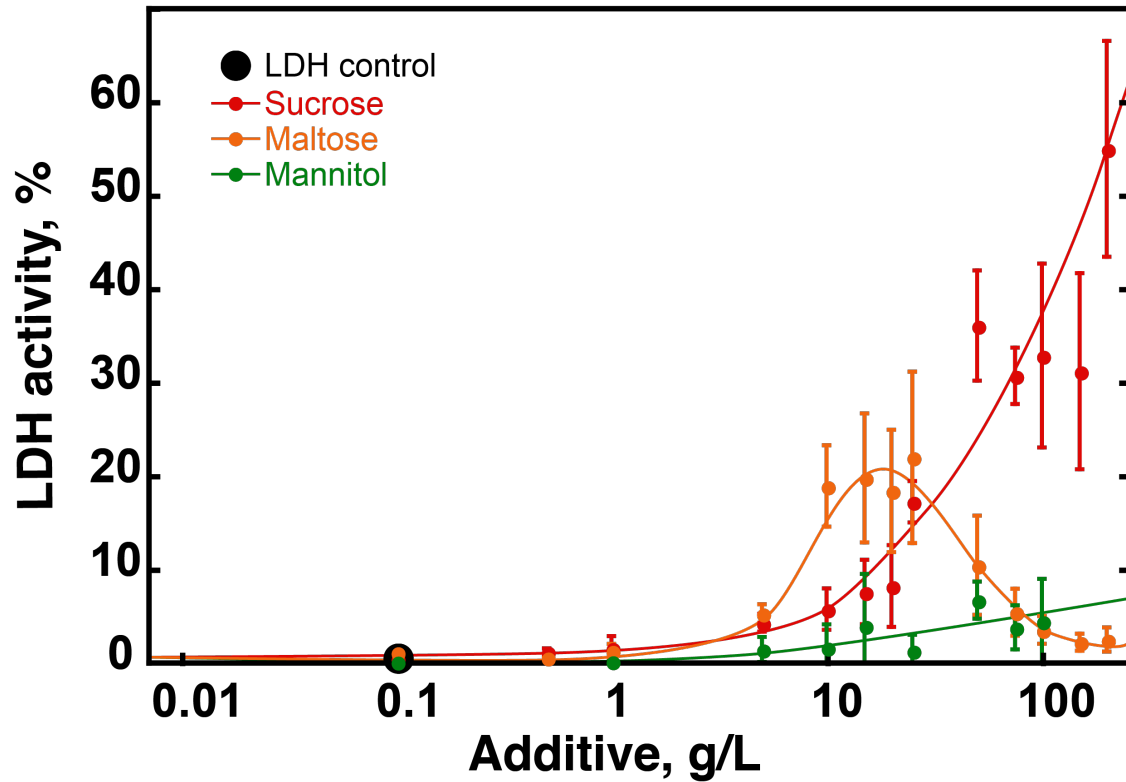

**Supplemental Figure 1.** Protecting LDH with sugars. Buffered LDH (0.10 g/L) was desiccated and rehydrated by itself or with additives. Percent activity was determined by comparison to a control of the same solution stored at 4 °C. Uncertainties are the standard deviation of the mean from triplicate measurements. Curves were added as a visual guide but have no theoretical significance.

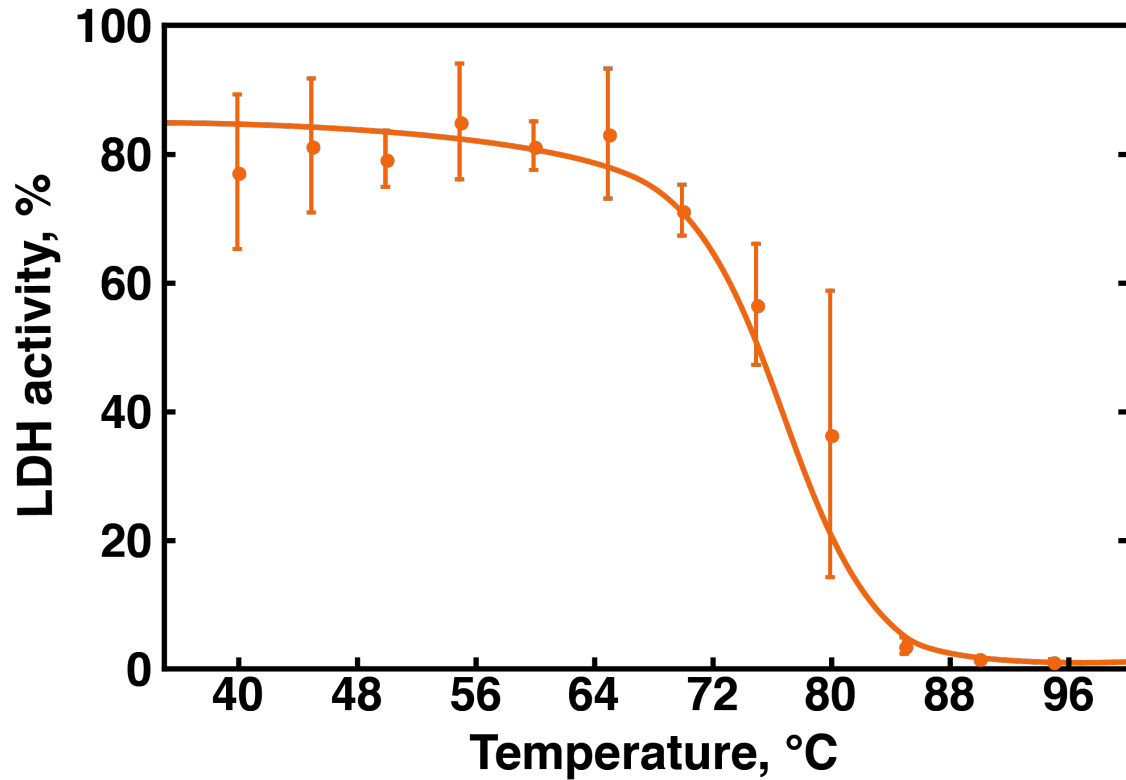

**Supplemental Figure 2.** Trehalose protects dry LDH from heat inactivation. Buffered LDH (0.10 g/L) was desiccated in the presence of 20 g/L trehalose before 5 min exposure to a fixed temperature. After cooling to room temperature and rehydration, the percent activity was determined by comparison to a control comprising the same solution stored at 4 °C. A smooth curve was added as a visual guide but has no theoretical significance.
